# 1 **Genome-Wide Mining, Characterization and Development of** 2 **miRNA-SSRs in *Arabidopsis thaliana***

3 Anuj Kumar<sup>1,2</sup>, Aditi Chauhan<sup>1</sup>, Sai Kumar Kompelli<sup>2</sup>, Vijay Gahlaut<sup>3</sup>, Johny Ijaq<sup>2</sup>, Krishna  
4 Pal Singh<sup>1</sup>, MNV Prasad Gajula<sup>4</sup>, Prashanth Suravajhala<sup>2,5,6</sup>, AK Mishra<sup>7</sup>, Harindra Singh  
5 Balyan<sup>2</sup>, and Pushpendra Kumar Gupta<sup>2</sup>

6 1. Advance Centre for Computational and Applied Biotechnology, Uttarakhand Council for  
7 Biotechnology (UCB), Dehradun-248007, India  
8 2. Bioclues.org, Kukatpally, Hyderabad 500072, Telangana, India  
9 3. Molecular Biology Laboratory, Department of Genetics & Plant Breeding, Ch. Charan  
10 Singh University, Meerut-250004, India  
11 4. Institute of Biotechnology, PJTSAU, Rajendra Nagar, Hyderabad-500030, India  
12 5. Bioinformatics Organization, 28 Pope st, Hudson, MA 01749, USA  
13 6. Department of Biotechnology and Bioinformatics, Birla Institute of Scientific Research,  
14 Statue Circle, 302001, RJ, India  
15 7. Indian Agriculture Research Institute, Pusa, New Delhi

## 16 **Corresponding authors:**

17 Anuj Kumar, [anujbioinfo91@gmail.com](mailto:anujbioinfo91@gmail.com)  
18

## 19 **Abstract**

20 Simple Sequence Repeats (SSRs), also known as microsatellites are short tandem repeats of  
21 DNA sequences that are 1-6 bp long. In plants, SSRs serve as a source of important class of  
22 molecular markers because of their hypervariable and co-dominant nature, making them  
23 useful both for the genetic studies and marker-assisted breeding. The SSRs are widespread  
24 throughout the genome of an organism, so that a large number of SSR datasets are available,  
25 most of them from either protein-coding regions or untranslated regions. It is only recently,  
26 that their occurrence within microRNAs (miRNA) genes has received attention. As is widely  
27 known, miRNA themselves are a class of non-coding RNAs (ncRNAs) with varying length of  
28 19-22 nucleotides (nts), which play an important role in regulating gene expression in plants  
29 under different biotic and abiotic stresses (Gupta et al., 2015, and references therein). In this  
30 communication, we describe the results of a study, where miRNA-SSRs in full length pre-  
31 miRNA sequences of *Arabidopsis thaliana* were mined. The sequences were retrieved by  
32 annotations available at EnsemblPlants using BatchPrimer3 server with miRNA-SSR  
33 flanking primers found to be well distributed. Our analysis shows that miRNA-SSRs are  
34 relatively rare in protein-coding regions but abundant in non-coding region. All the observed  
35 147 di-, tri-, tetra-, penta- and hexanucleotide SSRs were located in non-coding regions of all  
36 the 5 chromosomes of *A. thaliana*. While we confirm that miRNA-SSRs were commonly

37 spread across the full length pre-miRNAs, we envisage that such studies would allow us to  
38 identify newly discovered markers for breeding studies.

39

40 **Keywords:** MicroRNA, miRNA-SSRs, Genome-wide identification studies, noncoding  
41 RNAs, gene expression

42

### 43 **1. Introduction**

44 MicroRNAs (miRNA) represent a class of non-coding RNA (ncRNA) with varying length of  
45 19-22 nucleotides (nts) (Bartel, 2004). These miRNAs are endogenous in origin, and are found  
46 to play a major role in regulating the gene expressions in plants, fungi and animals, with bulk  
47 of the sequences linked to transcription factors (Bartel and Bartel, 2003). The miRNA are  
48 involved regulation of genes implicated in different processes including the following: (i)  
49 response to different biotic and abiotic stresses (Khraiwesh et al. 2012; Kompelli et al. 2015);  
50 (ii) different development and protein degradation processes (Eldem et al., 2012), (iii) pathogen  
51 invasion, signal transduction etc. (Jones-Rhoades et al. 2006; Jung et al. 2009).

52 Simple Sequence Repeats (SSRs), also known as microsatellites are short tandem  
53 repeats of DNA sequences that are 1-6 bp long (Gupta et al. 1996; Chen et al. 2009). The SSRs  
54 are found both in prokaryotic and eukaryotic genomes (Toth et al. 2000; Katti et al. 2001).  
55 SSRs are co-dominant, and multi-allelic by nature and due to constant variation in the number  
56 of tandem repeats; they are known to be, robust, highly polymorphic (Brandstrom et al. 2008,  
57 Heesacker et al. 2008), locus-specific and co-dominant, thus becoming the markers of choice.  
58 (Gupta et al. 1996; Ni et al. 2002; Lightfoot and Iqbal, 2013; Senan et al. 2014; Wang et  
59 al. 2015 ). Previous reports show that SSRs are selectively neutral and are randomly distributed  
60 in the eukaryotic genome (Schlotterer, 2000; Schlotterer, 2004). Although many of them are  
61 found in protein coding (Madsen et al., 2000), non-coding (Riley and Krieger, 2009a, 2009b) or  
62 untranslated regions (Mondal and Ganie, 2015) of plant genome, mainstream SSRs are  
63 regularly found in non-coding regions and relatively rare in protein coding regions (Madsen et  
64 al. 2008). Furthermore, with SSRs known to have numerous applications, application of SSRs  
65 in construction of genetic maps has led to significant interest (Gupta et al. 1996; Li et al. 2002;  
66 Usdin, 2008). While SSRs aid in chromatin organization (Cuadrado and Schwarzacher, 1998),  
67 available evidence show that SSRs located in promoter regions may affect the level of gene  
68 expression (Young et al. 2000). It has been reported that they are widely considered as a hot  
69 spots for recombination (Jeffreys et al. 1998; Templeton et al. 2000).

70 . Recently, SSRs have been reported in pre-miRNA sequences in some plant species. For  
71 instance, Chen et al. 2010 carried out a comprehensive analysis for the prediction of SSRs in  
72 8,619 premiRNA sequences from 87 species, including Arthropoda, Nematoda,  
73 Platyhelminthes, Urochordata, Vertebrata, Mycetozoa, Protistate, Viridiplantae, and Viruses. In  
74 another studies, salt responsive (trait specific) miRNA-SSRs were reported in rice genome  
75 (Ganie and Mondal, 2015; Mondal and Ganie) linking them to phenotype and expression of  
76 genes. Furthermore, studies on role of transcriptional profiling of SSR specific long noncoding  
77 RNAs (lncRNAs) are studied in Banana and sugarcane which supports the hypothesis there is a  
78 major role of SSRs in non-coding genome in both small and larger noncoding elements  
79 (Cardoso-Silva et al. 2014; Yang et al. 2015). However, no study has so far been conducted to  
80 study SSRs in Pre-miRNA full length transcripts of *A. thaliana*, which is a model plant system  
81 with a small genome that was the first higher plant genome to be fully sequenced (The  
82 Arabidopsis Genome Initiative, 2000). Because of enormous utilities of miRNA as well as  
83 SSRs, there is a need for development of markers associated with miRNA, so that markers may  
84 be developed for traits influenced by miRNAs. Keeping this in view of the prospective  
85 development markers from the noncoding regions, we discovered miRNA-SSRs in full length  
86 genomic sequences of pre-miRNAs of *A. thaliana*.

87

## 88 2. Methodology

89

### 90 2.1. Computational identification and discovery of miRNA-SSRs in *A. thaliana* 91 genome

92

93 A total of 325 pre-miRNAs of *A. thaliana* were downloaded from miRBase 21.0  
94 (<http://www.mirbase.org/>) (Kozomara et al. 2014) and full length genomic transcripts  
95 representing pre-miRNA were extracted in FASTA format using BioMart-Ensembl genomes  
96 (Kasprzyk, 2011) available in EnsemblPlants (Bolser et al.2015) (*see Supplementary Table*  
97 *1*); among 325 pre-RNAs, only 169 pre-miRNA sequences were found (*see Supplementary*  
98 *Table 2*) whose full length genomic sequences are available in EnsemblPlants. After  
99 downloading all full length premiRNA genomic transcripts from EnsemblPlants, manual  
100 annotation was done to confirm the transcripts (>1000bp + premiRNA) for the discovery of  
101 SSRs belonging to miRNA genes (i.e., promoter, 5' UTR, primRNA, or 3' UTR but not pre-  
102 or mature miRNA). The search for miRNA-SSRs and the designing of primers flanking  
103 miRNA-SSRs was carried out in full length premiRNA transcripts from all 5 chromosomes  
104 using BatchPrime3 v1.0 (You et al. 2008) with default parameters. A flow chart showing the  
105 pipeline used in this study is presented in Figure 1.

106

## 107 **2.2. Computational Prediction of SSRs-containing miRNAs**

108 As earlier documented, plant miRNAs predominantly target different families of transcription  
109 factors (TFs) (Llave et al. 2002; Chen, 2004; Brodersen et al. 2008; Gupta et al. 2015;  
110 Gahlaut et al. 2016). However, subsequent studies suggested that miRNAs also target plant  
111 functional protein encoding genes, which control various physiological processes, such as  
112 root growth and development, stress responses, signal transduction, leaf morphogenesis, plant  
113 defenses, and biogenesis of sRNA (Brousse et al. 2014). Unlike in animals, miRNAs in plants  
114 identify their target mRNAs through perfect or near-perfect complementarity and initiate  
115 cleavage.

116 The putative target sites of SSRs-containing miRNAs were predicted by aligning the  
117 miRNA sequences either perfectly or near-perfectly binding to complementary sites on their  
118 target mRNA sequences by using homology search-based psRNATarget server (Dai and  
119 Zhao, 2011). Transcripts of SSRs-containing miRNAs were used as a query against updated  
120 version of *A.thaliana* transcripts available on The Arabidopsis Information Resource (TAIR)  
121 (<https://www.arabidopsis.org/>). Following parameters embedded in psRNATarget algorithm  
122 were used: maximum expectation: 2.0, length for complementarity scoring (hspsize): 20,  
123 target accessibility-allowed maximum energy to unpair the target site (UPE): 25.0, flanking  
124 length around target site for target accessibility analysis: 17 bp in upstream and 13 bp in  
125 downstream, Range of central mismatch leading to translation inhibition: 9–11nt.

126

## 127 **2.3. Prediction of genes adjacent to identified miRNA-SSRs and analysis of enriched** 128 **gene ontologies (GO)**

129

130 Genes adjacent to identified novel miRNA-SSRs were manually predicted using the TAIR 9  
131 browser embedded in windows based integrated genome browser (IGB) (Nicol et al. 2009).  
132 The criteria for manual curation was based on location of SSRs and nearby gene located on 5'  
133 untranslated region (5' UTR) and 3' untranslated region (3' UTR) sites on a particular  
134 chromosome of *A. thaliana* genome. Further predicted adjacent transcripts were retrieved  
135 from the EnsemblPlants (Bolser et al., 2015) in FASTA format. Arabidopsis adjacent  
136 transcripts were used as input for Gene ontology analysis using agriGO (Du et al. 2010) and  
137 REVIGO (Supek et al. 2011) server.

138

## 139 **3. Result and Discussion**

140

### 141 **3.1. Dinucleotide repeats were found to outnumber other repeats**

142 In the present study, 147 miRNA-SSRs were discovered among 169 pre-miRNA genomic  
143 transcripts of *A. thaliana* genome (**Table. 1**). We found that dinucleotide SSR repeats  
144 (48/147) outnumbered the other repeats; primers designed for 45 of these dinucleotide repeats  
145 while no primers were designed for the remaining three SSRs including (AC)<sub>7</sub> associated  
146 with miR164b, (AT)<sub>7</sub> associated with miR165b and (TA)<sub>10</sub> associated with miR832A.  
147 Ten (10) different classes of dinucleotide SSR repeats were found in all premiRNA  
148 transcripts of *A.thaliana* and the largest count of dinucleotide repeat was TA. (**Fig.2**). While  
149 trinucleotide miRNA-SSR repeats were found to be less than dinucleotide repeats, only one  
150 of 38 repeats was found with no SSR flanking primer (TTC with miR837a and SSR length -  
151 12). Nevertheless, there were 37 SSR flanking primers found to be associated with them.  
152 Within 15 different classes of trinucleotide miRNA-SSRs repeats, TTC and CTT with same  
153 number of counts formed the highest count of trinucleotide repeats (**Fig.2**)

154 The tetranucleotide miRNA-SSRs (46) were found to be more than trinucleotide  
155 repeats but less than dinucleotide repeats. Primers flanking two SSRs viz. (TTTA)<sub>n</sub>, and  
156 (TTAT)<sub>n</sub> for miR164c and miR394a, respectively could not be designed (TTTA)<sub>n</sub> repeats was  
157 most abundant among the tetranucleotide repeats in discovered miRNA-SSRs. (**Fig. 2**). The  
158 pentanucleotide SSRs in pre-miRNA transcripts of *A. thaliana* were least frequent. Out of the  
159 12 of the 147 miRNA-SSRs, were pentanucleotide repeats. Primers flanking to 11 miRNA-  
160 SSRs were designed and no primers could be designed for, (TTGTT)<sub>3</sub> associated with  
161 miR777a. Only eight classes of pentanucleotide SSR repeats were found in all pre-miRNA  
162 transcripts of *A. thaliana* and TTTTA was found as topmost count of pentanucleotide SSRs  
163 (**Fig. 2**).The hexanucleotide miRNA-SSRs were least common and these belonged to  
164 (GTTTGA)<sub>n</sub>, (GGGAGG)<sub>n</sub>, (ACAAAT)<sub>n</sub>, and (CGTTTC)<sub>n</sub> classes to be associated with  
165 flanking primers and remarkably distributed across all 5 chromosome in *A.thaliana* genome  
166 (**Fig. 3**). The chromosomes 1 and 5 have maximum miRNA-SSRs, while chromosome 3 has  
167 minimum number of miRNA-SSRs (**Fig. 3**).

168

### 169 **3.2. Conservation of SSR loci spanning flanking regions**

170 The miRNA-SSR polymorphism will provide trait-related molecular markers at the specific  
171 chromosomal loci, which in turn would depend on the number of indels in the flanking  
172 regions. Whether or not they are dinucleotide repeats or compound repeats is dependent not  
173 only on variances at the each repeat unit of the sequences, but also on how they are arranged

174 or distributed across the genome. As we observed such repeats, it would be interesting to  
175 examine their locus specific polymorphism to allow their physically mapping.. It would be  
176 interesting to see if they can serve as unknown tagged sites which in turn would depend on  
177 the presence of a particular sequence tagged region or sequence tagged sites (STS). These  
178 STS' in principle can be used as potential markers.

179

### 180 **3.3. SSRs-containing miRNAs targeted diverse set of TFs**

181 On the basis of the biogenesis of miRNAs in plants, a homology search-based method was  
182 used to predict the targets for SSRs-containing miRNA in *A. thaliana* using psRNATarget.  
183 The SSR-containing miRNAs were used as queries to predict potential mRNA targets in the  
184 Arabidopsis genome annotation (TAIR10). This search revealed that 90 SSR-containing  
185 miRNAs identified 698 target genes, with each SSR-containing miRNA predicting more than  
186 one gene (Table S1). Most of the SSR-containing miRNAs targeted a number of TFs families  
187 including WRKY, MADS, MYB, NAC, bHLH, AP2/EREBP, ARF etc., which play an  
188 important role in different metabolic and regulatory processes such as stress response,  
189 transcriptional regulation, signal transduction, growth, development, nutrient uptake, nutrient  
190 transport and nutrient assimilation (**Table 2**). The values of UPE for targeted gene ranged  
191 from 3.238 to 24.941.

192 Targeted TFs could be utilized for developing next generation microsatellites, Transcription  
193 Factor Gene-Derived Microsatellite (TFGM) Markers which have potential in marker-  
194 assisted genetic improvement and genotyping applications through marker assisted selection  
195 (MAS) breeding program to develop the drought/heat responsive and nutrient efficient  
196 cultivars for cereal crops (Gupta and Prasad, 2009; Kujur et al. 2013, 2014; Liu et al. 2015 ).  
197 However in plants, (TFGM) markers have only been reported in chickpea and *Medicago*  
198 *truncatula* to date (Kujur et al. 2013; Liu et al. 2015).

199

### 200 **3.4. Prediction of genes adjacent to identified miRNA-SSRs and GO analysis**

201 In order to predict the genes adjacent to SSR containing miRNAs, representing 5' UTR and  
202 3' UTR sites TAIR 9 was manually curated. Based on length and chromosomal location, a  
203 diverse set of adjacent genes were predicted both in n5' UTR and 3' UTR regions (**Table. 2**).  
204 Predicted adjacent transcripts revealed that SSR containing miRNAs are associated with  
205 different genes in network form, which play a pivotal role in gene regulation. However effect  
206 of miR-SSR on adjacent genes and vice- versa need to be studied in detail.



207 To evaluate the biological significance of the adjacent genes to SSR containing miRNAs in  
208 Arabidopsis it is important to have the gene ontology (GO) descriptions i.e., detailed  
209 annotations of gene function, biological process it is involved, and cellular location of the  
210 gene product. The potential functions were predicted by searching against GO database using  
211 agriGO and REVIGO server. Predicted adjacent transcripts were subjected to singular  
212 enrichment analysis (SEA) embedded in agriGO to identify enriched GOs. SEA designed to  
213 identify enriched GO terms in a list form of microarray probe sets or gene identifiers  
214 available in database. Finding different enriched GO terms corresponds to finding enriched  
215 biological facts, and term enrichment level was judged by comparing query list to a  
216 background population from which the query list is derived. In this study the background  
217 query list comprised of 27,416 protein coding genes from the updated TAIR  
218 (<https://www.arabidopsis.org/index.jsp>). **Fig. 4** wholly reflects the categorization of  
219 adjacent genes based on biological process, cellular component and molecular function.  
220 Adjacent genes were divided into 14 GO categories. Among the adjacent gene transcripts,  
221 GOs associated with response to stimulus, cellular biosynthetic process, nitrogen compound  
222 metabolic process, nucleobase, nucleoside, cellular macromolecule metabolic process, protein  
223 metabolic process, transport activity, RNA metabolic process, gene regulation and binding  
224 (**Fig.5**).

225 In order to reduce the number of GO terms, enriched GO categories with false discovery  
226 rates (FDR) < 0.05 from AgriGO analysis were submitted to the REVIGO (REduce and  
227 Visualize GO) server. Using the Uniprot (<http://www.uniprot.org/>) as background and the  
228 default semantic similarity measure (Simrel), this analysis clearly showed that biological  
229 processes associated with metabolism, localization, nitrogen regulation, regulation of  
230 transcription were significantly overrepresented among the adjacent genes to SSR containing  
231 miRNAs in Arabidopsis (**Fig.6**).

232  
233

### **3.5. Taking an analogy with long non-coding RNAs**

234 If we may consider an analogy of this keeping in view of their larger non-coding peers, viz.  
235 lncRNAs, we might expect SSRs to be mapped to the lncRNAs as well. What remains a  
236 challenge is to see if the miRNAs/lncRNAs have a coding potential of transcripts in  
237 noncoding RNA as these are associated with “unknown transcripts” which eventually are  
238 unmapped. Can the SSR-miRNAs that code for non-coding elements prove to be real  
239 candidates for understanding gene expression in plants underlying to various traits as  
240 discussed above? If it were the case, with breakthrough in genome technology in the form of

241 clustered regulatory interspaced short palindromic repeats/CRISPR-associated protein  
242 9(CRISPR-Cas9) technology (Sander and Joung, 2014; Jain, 2015), it would be interesting to  
243 explore probable CRISPR loci that play a role into regulatory roles of these ncRNAs esp. the  
244 smaller miRNAs (Yi et al. 2015).

#### 245 **4. Conclusion**

246 In the present study, we discovered total 147 miRNA-SSRs from 169 pre-miRNAs representing  
247 full length genomic transcripts of *A. thaliana*. Our result shows that all the di-, tri-, tetra-, penta  
248 and hexanucleotide SSRs were located in non-coding repertoire of all the 5 chromosomes of  
249 *A.thaliana* (**Fig. 3**). While dinucleotide miRNA-SSRs were found to be higher, hexanucleotide  
250 miRNA-SSRs were found to be lowest repeats in the pre-miRNA transcripts. It was observed  
251 that miRNA-SSRs flanking primers were larger in number for discovered miRNA-SSRs. We  
252 firmly consider these candidates could be extended for experimentation for allelic variation. It  
253 is important to know that these miRNA-SSRs serve as a source of highly informative molecular  
254 markers and aids as a reference for marker assisted breeding in plants. We hope this first report  
255 on genome-wide identification and characterization of miRNA-SSRs in *A. thaliana* could serve  
256 as a reference for identifying more sequences from non-coding repertoire of the genomes.

#### 257 **Acknowledgments**

258 AK would like to give his sincere thanks to Mr. Deepak Kumar, Secretary, IT, ST & BT  
259 Government of Uttarakhand for encouragement, suggestions and timely help. PKG was  
260 awarded a National Academy of Sciences India (NASI) Senior Scientist Platinum Jubilee  
261 Fellowship, and INSA Senior Scientist positions during the tenure of which this study was  
262 conducted; VG was awarded a Junior Research Fellowship under the same program, and was  
263 later awarded the position of SRF/ RA under a DBT project.

#### 264 **Authors Contributions**

265 AK, AC, SKK, and VG performed the data analysis; KPS and MNVPG manually  
266 crosschecked the annotation. KPS assisted AK and AC for preparing the first draft. PS, HSB  
267 and PKG conceived, supervised, edited, and finalized the manuscript.

268

#### 269 **Conflict of Interest Statement**

270 The authors declare that the research was conducted in the absence of any commercial or  
271 financial relationships that could be construed as a potential conflict of interest.

272

#### 273 **References**



- 274 Bartel B, Bartel DP (2003) MicroRNAs: At the root of plant development?. *Plant Physiol*  
275 132:709-717
- 276 Bartel DP (2004) MicroRNAs: genomics, biogenesis, mechanism, and function. *Cell*  
277 116:281-297
- 278 Bolser DM, Kerhornou A, Walts B, Kersey P (2015) Triticeae resources in Ensembl  
279 Plants. *Plant Cell Physiol* 56:e3
- 280 Brandstrom M, Bagshaw AT, Gemmell NJ, Ellegren H (2008) The relationship between  
281 microsatellite polymorphism and recombination hot spots in the human genome. *Mol*  
282 *Biol Evol* 25: 2579-87
- 283 Brodersen P, Sakvarelidze-Achard L, Bruun-Rasmussen M, Dunoyer P, Yamamoto  
284 YY, Sieburth L, Voinnet O (2008) Widespread translational inhibition by plant  
285 miRNAs and siRNAs. *Science* 320:1185–1190
- 286 Brousse C, Liu Q, Beauclair L, Deremetz A, Axtell MJ, Bouché N (2014) A non-  
287 canonical microRNA target site. *Nucleic Acids Res* 42: 5270-5279
- 288 Cardoso-Silva CB, Costa EA, Mancini MC, Balsalobre TW, Canesin LE, Pinto  
289 LR, Carneiro MS, Garcia AA, de Souza AP, Vicentini R (2014) De novo assembly and  
290 transcriptome analysis of contrasting sugarcane varieties. *PLoS One* 9:e88462
- 291 Chen M, Tan Z, Zeng G, Peng J (2010) Comprehensive analysis of simple sequence  
292 repeats in Pre-miRNA. *MolBiolEvol* 27:2227-2232
- 293 Chen X (2004) A microRNA as a translational repressor of APETALA2 in Arabidopsis  
294 flower development. *Science* 303:2022–2025
- 295 Chen M, Tan Z, Jiang J, Li M, Chen H, Shen G, Yu R (2009) Similar distribution of  
296 simple sequence repeats in diverse completed Human Immunodeficiency Virus Type 1  
297 genomes. *FEBS Lett* 583:2959-2963
- 298 Cuadrado A, Schwarzacher T (1998) The chromosomal organization of simple sequence  
299 repeats in wheat and rye genomes. *Chromosoma* 107:587-594
- 300 Dai X, Zhao PX (2011) psRNATarget: a plant small RNA target analysis server. *Nucleic*  
301 *Acids Res* 39: 155-159
- 302 Du Z, Zhou X, Ling Y, Zhang Z, Su Z (2010) agriGO: a GO analysis toolkit for  
303 the agricultural community. *Nucleic Acids Res.* 38(W): 64–70
- 304 Eldem V, Okay S, Ünver T (2013). Plant microRNAs: new players in functional  
305 genomics. *Turk J Agric For* 37:1-21
- 306 Gahlaut V, Jaiswal V, Kumar A, Gupta PK (2016) Transcription factors involved in  
307 drought tolerance and their possible role in developing drought tolerant cultivars with  
308 emphasis on wheat (*Triticum aestivum* L.). *Theor Appl Genet* 129: 2019-2042
- 309 Ganie SA Mondal TK (2015) Genome-wide development of novel miRNA-based  
310 microsatellite markers of rice (*Oryza sativa*) for genotyping applications. *Mol*  
311 *Breeding* 35:51
- 312 Gupta PK (2015) MicroRNAs and target mimics for crop improvement. *Curr Sci* 108:  
313 1624-1633
- 314 Gupta PK, Balyan HS, Sharma PC, Ramesh B (1996) Microsatellites in plants: A new  
315 class of molecular markers. *Curr Sci* 70:45-53
- 316 Gupta S, Prasad M (2009) Development and characterization of genic SSR markers in  
317 *Medicago truncatula* and their transferability in leguminous and non-leguminous  
318 species. *Genome.* 52: 761–771
- 319 Heesacker A, Kishore VK, Gao W, Tang S, Kolkman JM, Gingle A, Matvienko M, Kozik  
320 A, Michelmore RM, Lai Z, Rieseberg LH, Knapp SJ (2008) SSRs and INDELs mined  
321 from the sunflower EST database: abundance, polymorphisms, and cross-taxa utility.  
322 *Theor Appl Genet* 117:1021-1029

- 323 Jain M (2015) Function genomics of abiotic stress tolerance in plants: a CRISPR  
324 approach. *Front Plant Sci* 6:375
- 325 Jeffreys AJ, Murray J, Neumann R (1998) High-resolution mapping of crossovers in  
326 human sperm defines a minisatellite associated recombination hotspot. *Mol Cell* 2:  
327 267-273
- 328 Jones-Rhoades MW, Bartel DP, Bartel, B (2006) MicroRNAs and their regulatory roles in  
329 plants. *Annu Rev Plant Biol* 57: 19–53
- 330 Jung JH, Seo PJ, Park CM (2009) MicroRNA biogenesis and function in higher plants.  
331 *Plant Biotechnol Rep* 3: 111–126
- 332 Kasprzyk A (2011) BioMart: driving a paradigm change in biological data management.  
333 *Database (Oxford)* 13:2011:bar049
- 334 Katti MV, Ranjekar PK, Gupta VS (2001). Differential distribution of simple sequence  
335 repeats in eukaryotic genome sequences. *MolBiolEvol* 18: 1161-1167
- 336 Khraiweh B, Zhu JK, Zhu J (2012) Role of miRNAs and siRNAs in biotic and abiotic  
337 stress responses in plants. *Biochem Biophys Acta* 1819:137-148
- 338 Kompelli SK, Kompelli VSP, Enjala C, Suravajhala P (2015) Genome-wide  
339 identification of miRNAs in pigeonpea (*Cajanus cajan* L.) *Aust J Crop Sci* 9:215-222
- 340 Kozomara A, Griffiths-Jones S (2014) miRBase: annotating high confidence microRNAs  
341 using deep sequencing data. *Nucleic Acids Res* 42(D):68-73
- 342 Kujur A, Bajaj D, Saxena M, Tripathi S, Upadhyaya HD, Gowda CL, Singh S, Tyagi A,  
343 Jain M, Parida S (2014) An efficient and cost-effective approach for genic  
344 microsatellite marker-based large-scale trait association mapping: Identification of  
345 candidate genes for seed weight in chickpea. *Mol Breed* 34: 241–265
- 346 Kujur A, Bajaj D, Saxena MS, Tripathi S, Upadhaya HD, Gowada CL, Singh S, Jain M,  
347 Tyagi AK, Parida SK (2013) Functionally relevant microsatellite markers from  
348 chickpea transcription factor genes efficient genotyping applications and trait  
349 association mapping. *DNA Res* 20: 355-374
- 350 Li YC, Korol AB, Fahima T, Beiles A, Nevo E (2002) Microsatellites: genomic  
351 distribution, putative functions and mutational mechanisms: a review. *MolEcol*  
352 11:2453-2465
- 353 Lightfoot DA, Iqbal MJ (2013) Molecular mapping and breeding with microsatellite  
354 markers. *Methods MolBiol* 1006: 297-317
- 355 Liu W, Jia X, Liu Z, Zhang Z, Wang Y, Liu Z, Xie W (2015) Development and  
356 Characterization of Transcription Factor Gene-Derived Microsatellite(TFGM)  
357 Markers in *Medicago truncatula* and Their Transferability in Leguminous and Non  
358 Leguminous Species. *Molecules* 20:8759-8771
- 359 Llave C, Xie Z, Kasschau KD, Carrington JC (2002) Cleavage of scarecrow-like mRNA  
360 targets directed by a class of *Arabidopsis* miRNAs. *Science* 297: 2053–2056
- 361 Madsen BE, Villesen P, Wiuf C (2008) Short tandem repeats in human exons: a target for  
362 disease mutations. *BMC Genomics* 9:410
- 363 Mondal TK, Ganie SA (2014) Identification and characterization of salt responsive  
364 miRNA-SSR markers in rice (*Oryza sativa*). *Gene* 535:204–209
- 365 Ni J, Colowit PM, Mackill DJ (2002) Evaluation of genetic diversity in rice subspecies  
366 using microsatellite markers. *Crop Sci* 42: 601–607
- 367 Nicol JW, Helt GA, Blanchard SG Jr, Raja A, Loraine AE (2009) The Integrated Genome  
368 Browser (IGB): free software for distribution and exploration of genome-scale  
369 datasets. *Bioinformatics* 25:2730-1
- 370 Riley DE, Krieger JN (2009a) Embryonic nervous system genes predominate in searches  
371 for dinucleotide simple sequence repeats flanked by conserved sequences. *Gene*  
372 429:74-79

- 373 Riley DE, Krieger JN (2009b) UTR dinucleotide simple sequence repeat evolution  
374 exhibits recurring patterns including regulatory sequence motif replacements. *Gene*  
375 429:80-86
- 376 Sander JD, Joung JK (2014) CRISPR-Cas  
377 systems for editing, regulating and targeting genomes. *Nat Biotechnol* 32:347-55
- 378 Schlotterer C (2000) Evolutionary dynamics of microsatellite DNA. *Chromosoma* 109:  
379 5844-5849
- 380 Schlotterer C (2004) The evolution of molecular markers-Just a matter of fashion? *Nat*  
381 *Rev Genet* 5: 63-69
- 382 Senan S, Kizhakayil D, Sasikumar B, Sheeja TE (2014) Methods for Development of  
383 Microsatellite Markers: An Overview. *Not Sci Biol* 6:1-13
- 384 Supek F, Bosnjak M, Skunca N, Smuc T (2011) REVIGO summarizes and visualizes long  
385 lists of gene ontology terms. *PloS One* 6:e21800
- 386 Templeton AR, Clark AG, Weiss KM, Nickerson DA, Boerwinkle E, Sing CF (2000)  
387 Recombinational and mutational hot spots within the human lipoprotein lipase gene.  
388 *Am J Hum Genet* 66:69-83
- 389 The Arabidopsis Genome Initiative (2000) Analysis of the genome sequence of the  
390 flowering plant *Arabidopsis thaliana*. *Nature* 408:796-815
- 391 Toth G, Gaspari Z, Jurka J (2000) Microsatellites in different eukaryotic genomes: survey  
392 and analysis. *Genome Res* 10: 967-981
- 393 Usdin K (2008) The biological effects of simple tandem repeats: lessons from the repeat  
394 expansion diseases. *Genome Res* 18:1011-1019
- 395 Wang Y, Yang C, Jin Q, Zhou D, Wang S, Yu Y, Yang L (2015) Genome-wide distribution  
396 comparative and composition analysis of the SSRs in Poaceae. *BMC Genetics* 16:18
- 397 Yang QS, Gao J, He WD, Dou TX, Ding LJ, Wu JH, Li CY, Peng XX, Zhang S, Yi GJ  
398 (2015) Comparative transcriptomics analysis  
399 reveals difference of key gene expression between banana and plantain in response to  
400 cold stress. *BMC Genomics* 16:446
- 401 Yi X, Zhang Z, Ling Y, Xu W, Su Z (2015) PNRD: a plant non-coding RNA database.  
402 *Nucleic Acids Res* 43:D982-989
- 403 You FM, Huo N, Gu YQ, Luo MC, Ma Y, Hane D, Lazo GR, Dvorak J, Anderson OD  
404 (2008) BatchPrimer3: a high throughput web application for PCR and sequencing  
405 primer design. *BMC Bioinformatics* 9:253
- 406 Young ET, Sloan JS, van Riper K (2000) Trinucleotide repeats are clustered in regulatory  
407 genes in *Saccharomyces cerevisiae*. *Genetics* 154:1053-1068
- 408
- 409

## 410 Legend

- 411 Figure 1. Pipeline used for discovery of miRNA-SSRs in *A. thaliana*.
- 412 Figure 2 .Incidence and number of di, tri, tetra, and pentanucleotide miRNA-SSRs.
- 413 Figure 3. Chromosomal locations of discovered miRNA-SSRs in *A.thaliana* genome.
- 414 Figure 4. GO classifications of adjacent genes to SSR containing miRNAs.
- 415 Figure 5. **GO analysis of adjacent genes to SSR containing miRNAs:** box reflects the GO  
416 term number, the p-value in parenthesis, and GO term. The first pair of numerals shows the  
417 number of adjacent genes in the input list associated with that GO term and the number of  
418 genes in the input list. The second pair of numerals represents the number of genes associated

419 with the particular GO term in the TAIR database and the total number of Arabidopsis genes  
420 with GO annotations in the TAIR database. The box colours indicates levels of statistical  
421 significance with yellow = 0.05; orange = e-05 and red = e-09.  
422

423 Figure 6. **GO analysis of adjacent genes to SSR containing miRNAs using REVIGO:** The  
424 scatter plot represents the cluster representatives (terms remaining after reducing redundancy)  
425 in a two-dimensional space derived by applying multi-dimensional scaling to a matrix of GO  
426 terms semantic similarities. Bubble color indicates the p-value for the false discovery rates  
427 derived from the AgriGO analysis. The circle size represents the frequency of the GO term in  
428 the uniprot database (more general terms are represented by larger size bubbles).  
429

430 Fig 1.

431

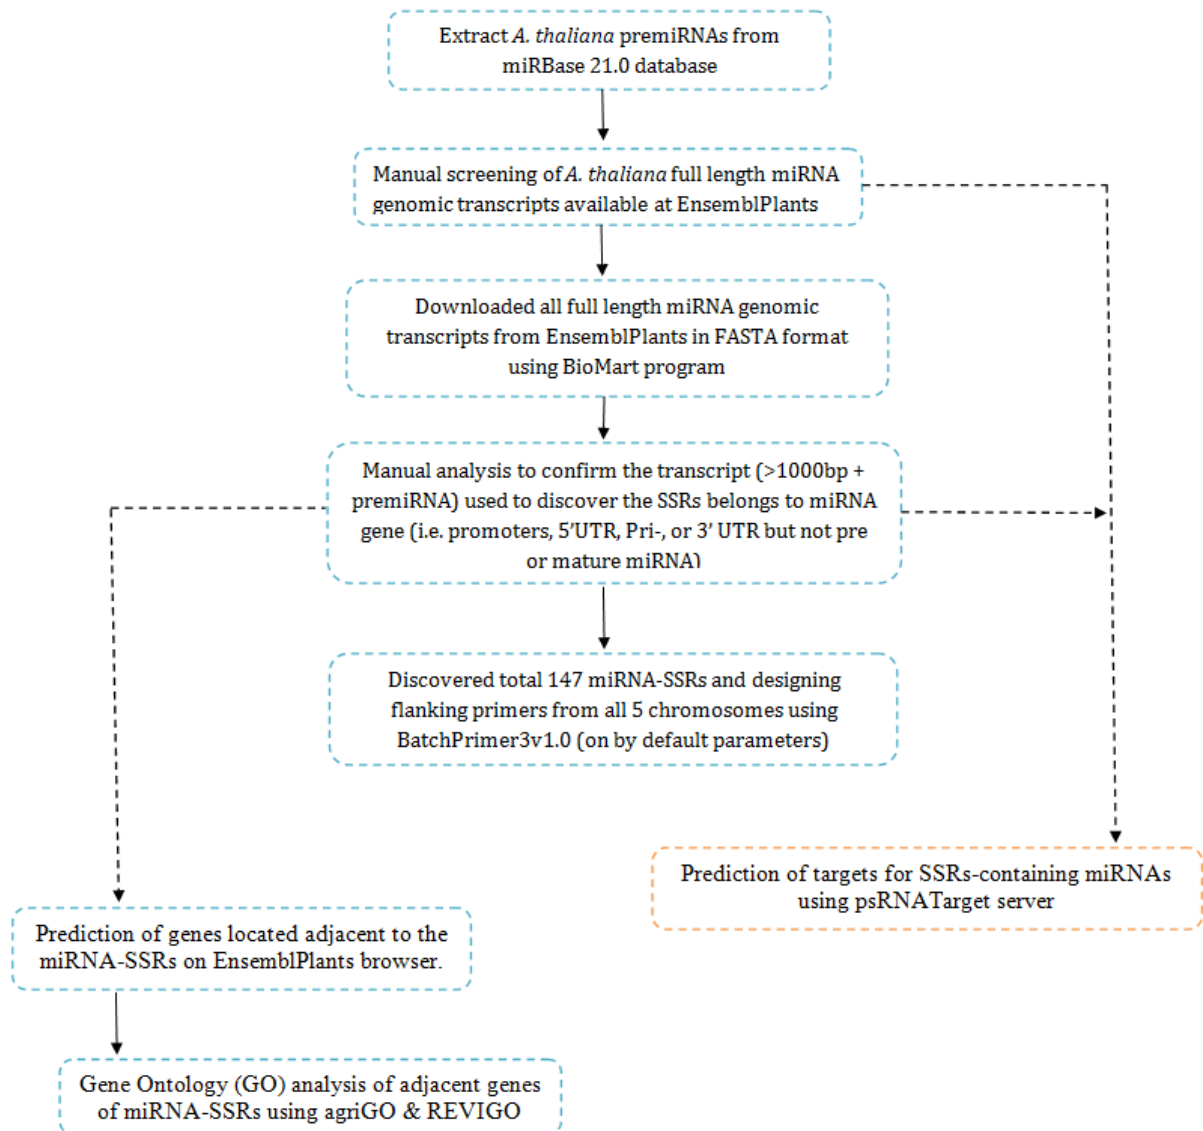

432

433

434 Fig 2.

435

436

437  
438  
439

### No. of SSRs Repeats

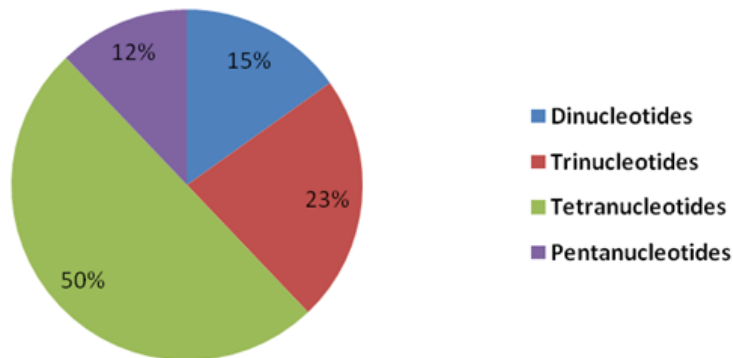

440  
441  
442  
443

Fig 3.

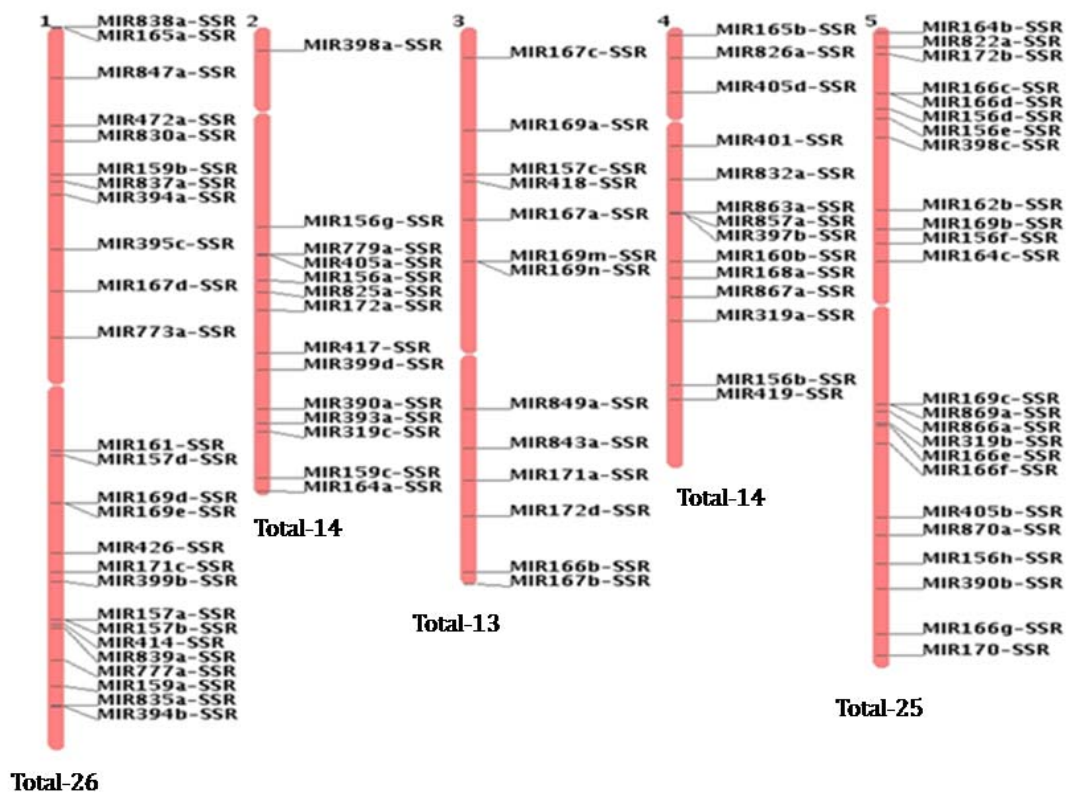

444  
445  
446



447  
448  
449  
450  
451  
452  
453  
454  
455  
456  
457  
458

Fig 4.

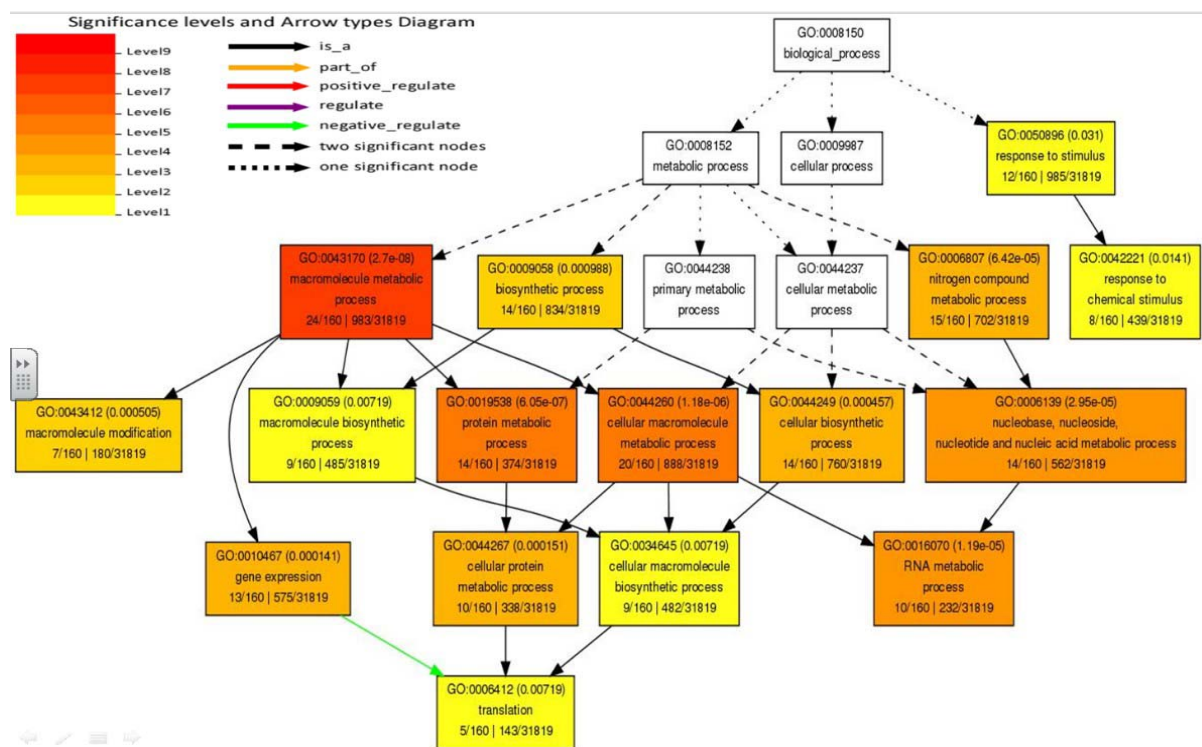

459  
460  
461  
462  
463  
464  
465  
466  
467  
468  
469  
470  
471  
472  
473  
474  
475  
476



477  
478  
479  
480  
481  
482  
483  
484  
485  
486  
487  
488  
489  
490  
491  
492  
493  
494  
495  
496  
497  
498  
499  
500  
501

Fig 5.

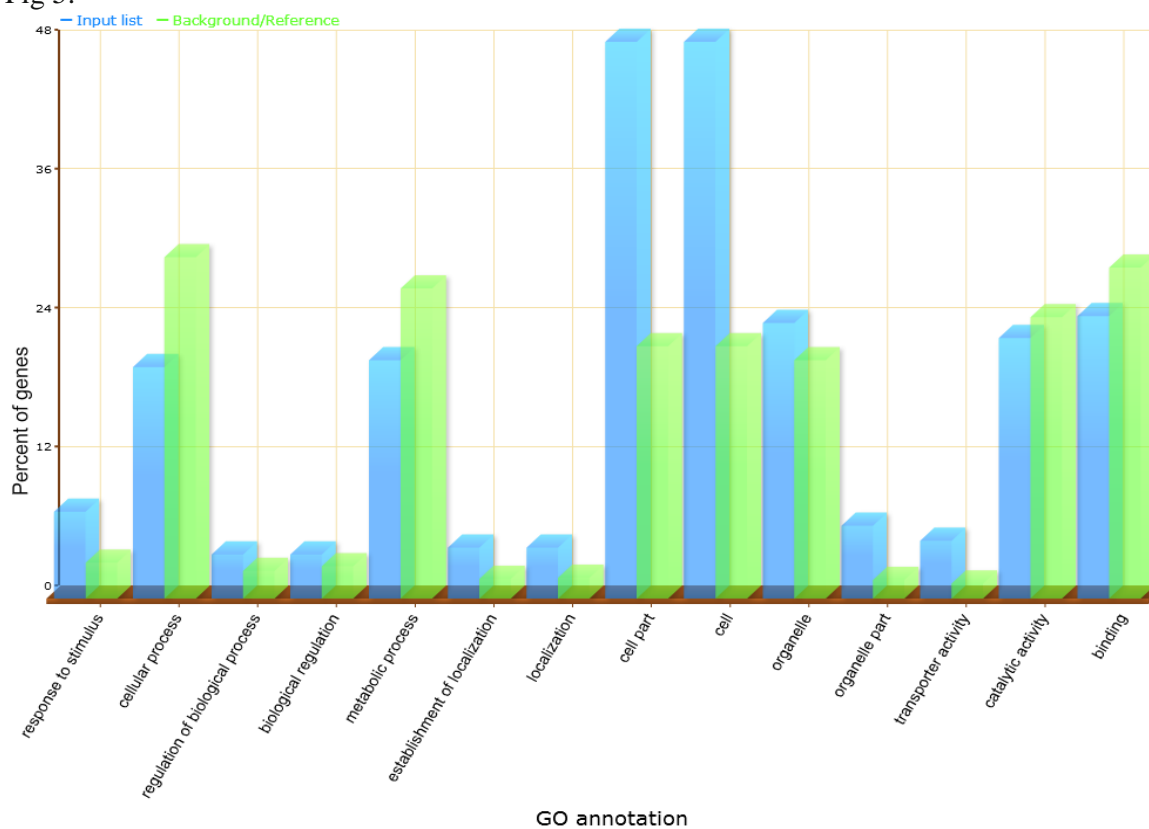

502  
503

504 Fig 6.  
505

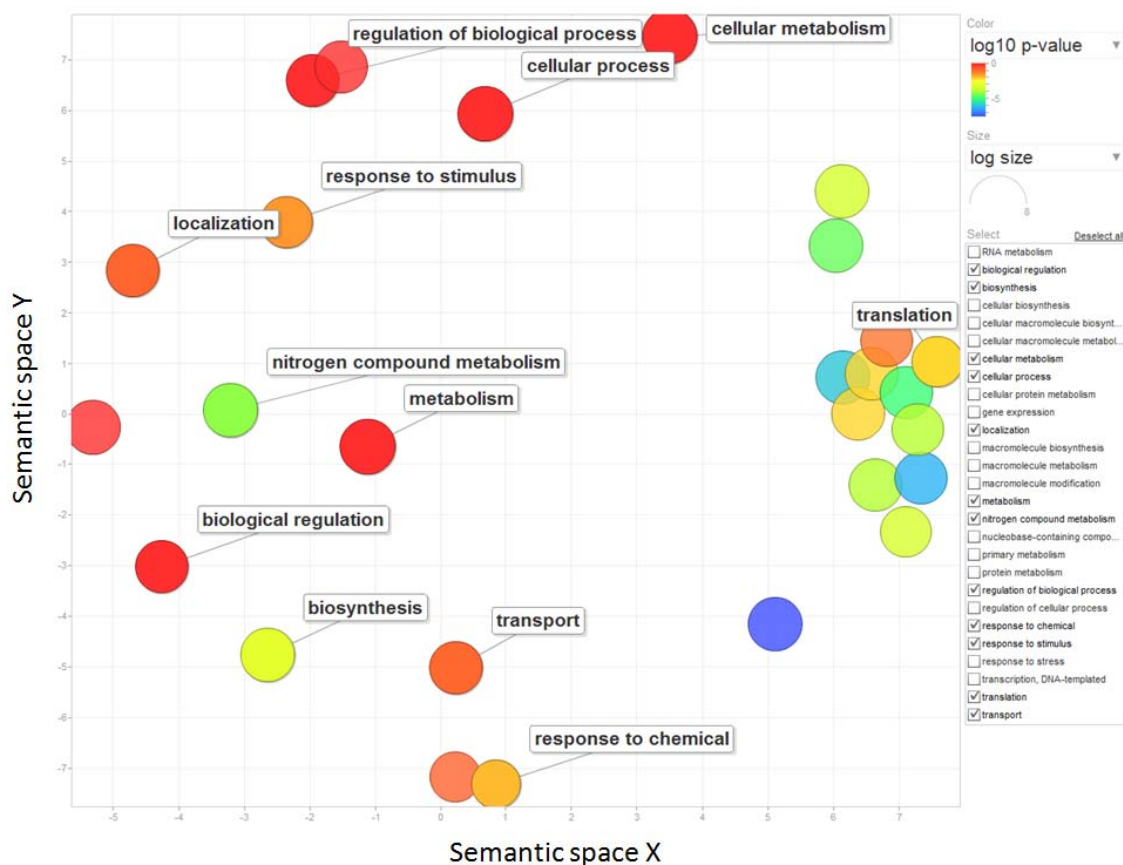

530

531 Table 1. Designed flanking primers for discovered miRNA-SSRs using BatchPrimer3 server.

| MIRNA   | Motif               | Primer Sequence        |                         | T <sub>m</sub><br>(°C) | Product<br>Size |
|---------|---------------------|------------------------|-------------------------|------------------------|-----------------|
|         |                     | Forward                | Reverse                 |                        |                 |
| MIR156a | (TCTT) <sub>3</sub> | ACAAGAGCCATAAAGAAAGGT  | AGGGTTTTTGTCTAAATCGAG   | 55                     | 154             |
| MIR156b | (CT) <sub>11</sub>  | CACCTCTCTTTCTGTCAGTTG  | ACACATCACTAGCAAAAGTGC   | 55                     | 140             |
| MIR156d | (TTC) <sub>6</sub>  | TCTCCATCATCTCTGTTTCAC  | GGCTGCTTTACTTCTCTCTCT   | 55                     | 154             |
|         | (GAGT) <sub>3</sub> | TGTTGGATTCACTTTCATTC   | AAGGAGATAAACTCAGAATTGC  | 55                     | 176             |
| MIR156e | (TC) <sub>7</sub>   | TTGAAGCTATGTGTGCTTACTC | ACTTTGATCCGTTTGATGATA   | 55                     | 153             |
| MIR156f | (CT) <sub>9</sub>   | GAAGCTATGTGTGCTCACTCT  | GTAAAACCAAAAGAATGGATG   | 54                     | 139             |
|         | (AT) <sub>8</sub>   | ACTCTCTTCTGTCTCCTGCT   | AACCATACACAGAGACGTTTG   | 55                     | 153             |
| MIR156g | (GAT) <sub>4</sub>  | AAACGTAGCTAGTGGTCAGTG  | AAACGTAGCTAGTGGTCAGTG   | 55                     | 152             |
|         | (TATC) <sub>3</sub> | ACTCTCTTCTGTCTCCTGCT   | AACCATACACAGAGACGTTTG   | 55                     | 153             |
|         | (CATG) <sub>3</sub> | ACTCTCTTCTGTCTCCTGCT   | AACCATACACAGAGACGTTTG   | 55                     | 153             |
| MIR156h | (TTC) <sub>5</sub>  | TCATCCTCTCGCTATAAATG   | AGGTTGTGCTCTCTTTCTTCT   | 55                     | 144             |
|         | (TCA) <sub>4</sub>  | TTCGTTGCTCTCTATGTGTCT  | TTCGTTGCTCTCTATGTGTCT   | 55                     | 161             |
| MIR157a | (AAGT) <sub>3</sub> | GTTCGTAGTCTTCTCAAATCG  | AACCATCAAACCTTATGGAAT   | 55                     | 170             |
| MIR157b | (TCA) <sub>4</sub>  | TAGCTGTCCTCTATGCGTCTA  | TCAAGAAGTTGATTAACACCA   | 55                     | 187             |
|         | (TA) <sub>8</sub>   | TATTTTCCCTTTGTCACCTCA  | GTCAACAACCAACATCACTCT   | 55                     | 150             |
| MIR157c | (AT) <sub>22</sub>  | TTTGGTAACCTGATCTCCATA  | CCAAACTATCAAACCAAACCTG  | 54                     | 137             |
|         | (TA) <sub>13</sub>  | TATGCTTCTGTCATCACCTTT  | ACTTTTCTCACACCAAACAA    | 55                     | 156             |
| MIR157d | (AAAG) <sub>3</sub> | GATGCTATGCAAAACAGACAC  | GGTGATGACAGAAGCATAGAG   | 55                     | 151             |
|         | (TC) <sub>6</sub>   | ATTTCTTCCAAAACATGACG   | CAAAAACACCAAAAGAGGTAA   | 55                     | 158             |
| MIR159b | (TC) <sub>7</sub>   | TAATGGCTTCACTCTTCTTTG  | CTACTCAAGATCCATCATCCA   | 55                     | 153             |
|         | (AAT) <sub>4</sub>  | GACAATAAGATTTACTGCCAAA | AAAGAGCATCAACCCTAGTCT   | 54                     | 141             |
| MIR159c | (CAT) <sub>4</sub>  | ATAATCGTCCCAAGGAGTAGA  | AAACTATGGAAAGAGGGAGAA   | 55                     | 141             |
|         | (AAAT) <sub>4</sub> | CACCCTAACCGTATCTCTCTC  | TCTACTCCTTGGGACGATTAT   | 55                     | 190             |
| MIR160b | (TA) <sub>6</sub>   | CCAATCATATTTAAGGGTTCC  | TTGGTCATGCTTGACTACTCT   | 55                     | 150             |
| MIR161  | (AGA) <sub>4</sub>  | CTTTGTTTGAGATTGCATCAT  | TGACTACCAGTCTACCACTATGT | 55                     | 158             |
|         | (TTTA) <sub>3</sub> | GTTTGTTTCATCAACCGATTT  | TCGATTCTTGCTTTTGTAAC    | 55                     | 153             |
| MIR162b | (TTGT) <sub>3</sub> | GATTCGATAAAGTCTTCTCAGC | TGATCTGTTACCCAAAACAAT   | 55                     | 173             |

|                |                     |                              |                        |    |     |
|----------------|---------------------|------------------------------|------------------------|----|-----|
| <b>MIR164a</b> | (CA) <sub>9</sub>   | TTGCCTTACGTAACACACT          | TGAGAACTTTGGTTATGGAAA  | 38 | 137 |
|                | (AC) <sub>7</sub>   | No SSR flanking primer found |                        |    |     |
|                | (TA) <sub>7</sub>   | GGAATCACGTTTTCAAATATC        | AAGTGCGAGTGTTGTTTATGT  | 54 | 149 |
| <b>MIR164b</b> | (TC) <sub>10</sub>  | ATCATACCCCAAGGTAACATA        | ATTCTCTCCGACCACATAACT  | 55 | 153 |
|                | (TG) <sub>6</sub>   | AGTTATGTGGTCGGAGAGAAT        | TCATCCATATCATCACACTCA  | 55 | 165 |
|                | (ACAT) <sub>3</sub> | ATCATACCCCAAGGTAACATA        | ATTCTCTCCGACCACATAACT  | 55 | 153 |
|                | (TACG) <sub>3</sub> | GAGGAAGTAGATACCTCTGC         | GATCAAGATGCGTGATCATA   | 54 | 135 |
| <b>MIR164c</b> | (TTTA) <sub>4</sub> | No-SSR flanking primer found |                        |    |     |
| <b>MIR165a</b> | (AT) <sub>7</sub>   | ACTATGAAACCTTCACGCATA        | CCTCATCATAACACCATCATC  | 54 | 154 |
|                | (CT) <sub>7</sub>   | CCTCATCATAACACCATCATC        | TAATATCCTCGATCCAGACAA  | 55 | 157 |
|                | (AT) <sub>7</sub>   | No-SSR flanking primer found |                        |    |     |
| <b>MIR165b</b> | (TC) <sub>7</sub>   | ACGACTTATTCAGCCTTCTT         | GCAGCTCAATCTTATGTGAGT  | 55 | 155 |
|                | (TC) <sub>14</sub>  | TTTGGCTCTCTCCACTTAC          | GGCTAAGATCAAGGAAGAGAA  | 56 | 146 |
|                | (AAG) <sub>5</sub>  | TTCTCTCCTTGATCTTAGCC         | AGAAAAATCCCTCTTTAAATCC | 55 | 159 |
|                | (TC) <sub>6</sub>   | CACGTCACAATTCACATCTTA        | TTAAGTCTCGTCGTTGTCTTC  | 54 | 161 |
| <b>MIR166c</b> | (TCT) <sub>4</sub>  | GTGGTCATTTGTCCTCTAT          | CCACGTTATCAAGAAGAGAAA  | 55 | 150 |
|                | (CTTT) <sub>3</sub> | CACTCGAATTAATTTGGAAGA        | GGTCGCAAGATAGAACAAATA  | 55 | 150 |
| <b>MIR166d</b> | (CTT) <sub>7</sub>  | AATATTCGCCTCACACATAGA        | TCAATCTACCGATCTTCTTCA  | 55 | 141 |
| <b>MIR166e</b> | (TC) <sub>8</sub>   | CCCTCTCTCTTTTCATCATT         | CTCAAAAGGAAAAGCTTCACT  | 55 | 152 |
| <b>MIR166f</b> | (GAT) <sub>5</sub>  | GTCTTTCTGAGCCAAAAGTTC        | CTTGAAGATTGAGAAGCAAAA  | 56 | 146 |
| <b>MIR166g</b> | (CTT) <sub>5</sub>  | TAGGGCTTAGATCTTTTGTC         | AACCCTAAATCGCTTCACTAT  | 55 | 162 |
| <b>MIR167a</b> | (AAAG) <sub>4</sub> | CCAAAAACCAAGAATAAGAAGA       | CCAAAAACCAAGAATAAGAAGA | 55 | 162 |
| <b>MIR167b</b> | (GA) <sub>11</sub>  | TGGAGTCAAACATAAGAATGGA       | TATATCTCCACCACCTGTGAC  | 55 | 173 |
|                | (CT) <sub>7</sub>   | TCACAGGTGGTGGAGATATAG        | TTAAAGAAGCCTGAAACAGTG  | 55 | 150 |
| <b>MIR167c</b> | (AG) <sub>7</sub>   | AGCATGATCTTGTCTTCTCT         | TCTCTTCATGCTACAATCAT   | 55 | 158 |
|                | (AGA) <sub>7</sub>  | GAGAGAGACTAGGTCATGCTG        | TTCATGAGATCCTCTTTCTGA  | 54 | 129 |
| <b>MIR167d</b> | (TG) <sub>7</sub>   | AACAAGGATCTGTGTAACGTG        | GAAAAATGCTCAGCTTGATAA  | 55 | 152 |
|                | (GT) <sub>7</sub>   | ATGTATGTGGTGTGTGTGTC         | GAGGGATCGTAAAAGTTAAGG  | 55 | 157 |
| <b>MIR168a</b> | (CTT) <sub>4</sub>  | AGTGTGAAAGCGAAAATCTCT        | TAATGGGGAAATGAGGTTTAT  | 56 | 157 |
|                | (AATA) <sub>3</sub> | CACGTGCTTCTCAAAAAGATA        | GTCTCTTTTACCCGAGAGT    | 55 | 186 |

|                |                       |                         |                         |    |     |
|----------------|-----------------------|-------------------------|-------------------------|----|-----|
| <b>MIR169b</b> | (TTCA) <sub>3</sub>   | TGAACATATTTCTGGCAAGTT   | CTCATACGGTCGATGTTAATC   | 55 | 134 |
| <b>MIR169c</b> | (TTTA) <sub>3</sub>   | TTGAGATGCTAAAGTAGAGCAA  | CGAAGTTGAATTTTGACATTG   | 55 | 178 |
|                | (TTAT) <sub>4</sub>   | GGCTCAACATGTAGGAAAAGTA  | GATTGGAGCAAACATAACTCTT  | 55 | 167 |
| <b>MIR169d</b> | (CGAT) <sub>3</sub>   | TAATACCGAAAACCCAAAACCT  | CCACCTGTCGTACTTTTCTTA   | 55 | 162 |
| <b>MIR169e</b> | (ATG) <sub>5</sub>    | TCATCATGAGTTAGGGTTTTG   | TCATCATGAGTTAGGGTTTTG   | 55 | 140 |
|                | (ATC) <sub>4</sub>    | AAAGATTCTCCCTTCTTTTT    | GCTGCAAGTACAAGTGTTGA    | 55 | 160 |
| <b>MIR169m</b> | (AT) <sub>14</sub>    | AGATGGACATGACAAGAAAAA   | ATCCATGTTCTTCCACAATC    | 55 | 165 |
| <b>MIR169n</b> | (TA) <sub>6</sub>     | AAACACGTCTAAAGTTGCATT   | GTCGGTTCATTCATAAATTG    | 55 | 144 |
|                | (AT) <sub>14</sub>    | AGATGGACATGACAAGAAAAA   | AGATGGACATGACAAGAAAAA   | 55 | 165 |
| <b>MIR170</b>  | (CTT) <sub>4</sub>    | GTGCATTGAGAGTAGCAGAGT   | GGACTCTCTCGGAAACATAGT   | 55 | 157 |
| <b>MIR171a</b> | (AG) <sub>6</sub>     | TTGAGGTTTTGTAAAAAGCAG   | ATAAATTTTGAGGGAATCTCG   | 55 | 139 |
|                | (AGAA) <sub>4</sub>   | GCAGAGAAAGAGAGAGAGAGG   | ATCGATGAAGATGCTTTGTAA   | 55 | 142 |
| <b>MIR171c</b> | (TCAC) <sub>3</sub>   | GCCCAATGTTATAAAGGGTAG   | GACACCTTCAATTTCTGTGATA  | 56 | 172 |
|                | (TC) <sub>11</sub>    | ACAGTCACATCTCTACTGTGC   | TTGGAAGCCATATATTAACCA   | 55 | 118 |
| <b>MIR172a</b> | (CT) <sub>7</sub>     | TGATTCACTCTCCACAAAGTT   | ACCTACCTGAAGAAGATCTGG   | 55 | 142 |
|                | (GTTTGA) <sub>5</sub> | TGAAGGTACGAGTTTCTAGTGTC | CGGAAATTAGTCTTCCATTTT   | 55 | 182 |
| <b>MIR172b</b> | (TTC) <sub>4</sub>    | TCTTATGACGTAAAAGGACCA   | TTCGATCTCTATTTTCTTGGA   | 55 | 171 |
| <b>MIR172d</b> | (CT) <sub>9</sub>     | GTATCTTCGATTACGATGTGC   | GGAAGAGATTTAGGGTGAAGA   | 55 | 155 |
|                | (TA) <sub>6</sub>     | TCAGAAATCCAGATCCTCATA   | ATCATTCATCATCGTTTTGTGTC | 55 | 163 |
|                | (CT) <sub>6</sub>     | ATCTACCATCCCTTTTCTACG   | AGAGATGGGAAAAGAAGATGA   | 55 | 144 |
|                | (ATAC) <sub>3</sub>   | ATCTACCATCCCTTTTCTACG   | AGAGATGGGAAAAGAAGATGA   | 55 | 144 |
| <b>MIR319a</b> | (ATAC) <sub>3</sub>   | GTTCCAAACGCTCTATCTCTT   | CGAAAAACCATGATTTAGAAG   | 55 | 154 |
|                | (AATG) <sub>3</sub>   | CCAAAATTCAAACTAGACTCG   | TAGTGGATCAAGCATGTTTTT   | 54 | 157 |
| <b>MIR319b</b> | (AATG) <sub>3</sub>   | TCCACTCATGGAGTAATATGTG  | CTTCAGTCCAAGCATAGAGAA   | 55 | 146 |
| <b>MIR319c</b> | (AAT) <sub>5</sub>    | TCTTCGGTTATGACGACTATG   | AATAAATCAGGGAGGAAAATG   | 55 | 148 |
|                | (ATA) <sub>4</sub>    | TCTTCGGTTATGACGACTATG   | AATAAATCAGGGAGGAAAATG   | 55 | 148 |
| <b>MIR390a</b> | (ATTA) <sub>3</sub>   | GTCGGGTAAGTTTCATCTGTA   | GTCGGGTAAGTTTCATCTGTA   | 54 | 144 |
| <b>MIR390b</b> | (TA) <sub>7</sub>     | TGTAATATGGGGACACTTAGC   | CATCCATAGGTATGCATCTTC   | 54 | 164 |
|                | (TA) <sub>14</sub>    | GCTATTTCCGAAAACCTTTTGT  | CAAACCTACCAAGTAAGCATGAA | 55 | 155 |
|                | (AAG) <sub>4</sub>    | CAACCTTGATCTCAAGCCTA    | AAATCCAATGAAGAAGAAAGC   | 55 | 162 |

|                |                       |                                |                         |    |     |
|----------------|-----------------------|--------------------------------|-------------------------|----|-----|
| <b>MIR393a</b> | (AAAT) <sub>4</sub>   | CGTCTGGTTTACTAGCTCCAT          | GATCGTGTTCCTCTTGATTTT   | 56 | 149 |
|                | (TTAT) <sub>5</sub>   | No SSR-flanking primers found! |                         |    |     |
| <b>MIR394b</b> | (TC) <sub>7</sub>     | TGCCTCTTTCTCAATCTCATA          | CGAATGTAACATCGAGAGGTA   | 55 | 149 |
| <b>MIR395c</b> | (TTTGG) <sub>4</sub>  | TTTGTTTACACCCAAACCTAA          | AATGCGAGTGACAGTCATTAT   | 55 | 133 |
| <b>MIR397b</b> | (TTTTA) <sub>3</sub>  | ATGAAGAAAACACCCAAAAAAG         | TCTCCACAATAGTCACGCTAC   | 56 | 148 |
| <b>MIR398a</b> | (TCT) <sub>4</sub>    | CCAAAACCAACTAAAACCTGAA         | GCTTTGGAATAAACAGAGGAG   | 55 | 134 |
|                | (CTT) <sub>4</sub>    | GTACGAGTATCCGTAGAGCAG          | AAACTCGAACCAGAACAAACT   | 55 | 151 |
| <b>MIR398c</b> | (TGTTG) <sub>3</sub>  | ATCAGTTTCGCAGTACACAAT          | CACAACAAATGATGAAAGGAT   | 55 | 159 |
| <b>MIR399b</b> | (CATG) <sub>3</sub>   | AAAAATGACATGGTGTACTCA          | TTCAGAGAGGGTTGTTTGATA   | 53 | 146 |
| <b>MIR399d</b> | (TTG) <sub>4</sub>    | AACACAATCGTCTTTCATCAC          | TGGTTCTTTCTTCTTTCCTC    | 55 | 138 |
|                | (TTCT) <sub>3</sub>   | TCATACGGTTCTCGAAGAATA          | GCAACTCAAAATTTGTGAAAC   | 55 | 146 |
| <b>MIR399d</b> | (GAAA) <sub>3</sub>   | GATTCTTTCTTCTTCTGTTGG          | TAAGGAATGGTTGATGACACT   | 55 | 147 |
|                | (TA) <sub>11</sub>    | CCAACATTCAAGATCCTTCTA          | CAAGTTCCTCTTGTACTC      | 55 | 151 |
| <b>MIR405a</b> | (AACCC) <sub>3</sub>  | TTGTTACTAGGGGTGTCAAAA          | CCCATCAAATGAAATGAGTTA   | 55 | 144 |
| <b>MIR405b</b> | (GTTGG) <sub>3</sub>  | CCCATCAAATGAAATGAGTTA          | TTAAGTTCATTCCTGTGGGTA   | 55 | 157 |
|                | (ATTA) <sub>3</sub>   | GATTTTCCCGTCTAAAAATGT          | GATGGGTTGAGTTGTTAAATG   | 55 | 168 |
| <b>MIR405d</b> | (GTTGG) <sub>3</sub>  | GGGTCTAACCCATAACTCATT          | GCAACATTCTCCTTTTCTTTT   | 55 | 168 |
|                | (CA) <sub>6</sub>     | AGTCACACAACCTTTGACATC          | AGAGGGCAGATAGAGTTGAAG   | 55 | 151 |
|                | (AT) <sub>6</sub>     | AGTCACACAACCTTTGACATC          | AGAGGGCAGATAGAGTTGAAG   | 55 | 151 |
| <b>MIR414</b>  | (TTC) <sub>4</sub>    | TAATGTTTATCTCCGACTCCA          | GCATCCTTAGACCAGTCTTTA   | 55 | 145 |
|                | (ATC) <sub>4</sub>    | TATTAGATGGTGGTGAGGATG          | GATGACGATGATGATGAAGAT   | 55 | 134 |
| <b>MIR417</b>  | (TCA) <sub>6</sub>    | GCTTGAAGTCGAAGATAAAGA          | TTGCTTCTCAACTCAAATCTC   | 54 | 157 |
|                | (AAAT) <sub>3</sub>   | AGGTTGTACTTATGTGGTGGGA         | AGATAATGTAGGTGGGAGATACA | 55 | 147 |
| <b>MIR418</b>  | (CAAA) <sub>5</sub>   | AGGTGTCAGGTTCTACACAAA          | CCAATACATGTGTTAGGATTTTT | 55 | 150 |
|                | (TTTTA) <sub>3</sub>  | AAATACCCCAAAAAGAGACAC          | AAATACCCCAAAAAGAGACAC   | 55 | 146 |
| <b>MIR419</b>  | (TTGC) <sub>3</sub>   | GCTGAGGATGTTGTTATTACG          | GGTTCATGACTTGTTTTCTTG   | 55 | 158 |
| <b>MIR426</b>  | (TAAA) <sub>4</sub>   | GTGGACCAAAAAGACATACAAT         | TGGTGTGTTTCTTTCCTCTA    | 54 | 200 |
|                | (GGGAGG) <sub>3</sub> | TGCAATGGATCAGTTAGAATAG         | ATCGTCATGTGGACAAGTATT   | 55 | 151 |
| <b>MIR472a</b> | (TGTA) <sub>3</sub>   | AAGGGGAGTCATATTCTCATC          | CAAACACCAAAAACCTTACAAA  | 55 | 200 |



|                |                       |                                |                        |    |     |
|----------------|-----------------------|--------------------------------|------------------------|----|-----|
|                | (AAT) <sub>4</sub>    | TGTCTAAGAGAGTTTTTAGCAAG        | GTTATTGGGCTTTTATTGGAT  | 53 | 292 |
| <b>MIR773a</b> | (TTAT) <sub>3</sub>   | CTGGTACATTCATAGTTGTTGC         | CAAAACTCTACTCCGTGTTTG  | 55 | 151 |
|                | (TTGTT) <sub>3</sub>  | No-SSR flanking primer found   |                        |    |     |
| <b>MIR779a</b> | (TGTTT) <sub>3</sub>  | GTTAGCTGAGCAACCATACTT          | CTCATTAAAGCACAATGCTTTC | 54 | 150 |
| <b>MIR822a</b> | (TA) <sub>20</sub>    | GTTTCAGAAAGGGAAAACATT          | CGAAATCGAGTTTGTAAATTC  | 55 | 202 |
| <b>MIR825a</b> | (CTAT) <sub>3</sub>   | ACAGGTCAATGGTGTAGAAA           | AACTGCACAAAGTCTACAAGC  | 55 | 139 |
|                | (TGCA) <sub>3</sub>   | TTATTATTTGGAGCCATCAAC          | GTCTGTTTCTGTGTGATTCGT  | 55 | 167 |
| <b>MIR826a</b> | (ACAAAT) <sub>3</sub> | CCCTAAAGTATGGGTTCACTT          | GCACATGCACATGTACAATAA  | 55 | 140 |
| <b>MIR830a</b> | (TTTTG) <sub>3</sub>  | TGACACTTGTTAAAAACTCAGC         | TAGCGAGACTCTGGTGAAATA  | 55 | 150 |
|                | (TA) <sub>10</sub>    | No SSR-flanking primers found! |                        |    |     |
| <b>MIR832a</b> | (TTTG) <sub>3</sub>   | GCGTTGAGTTTAAATTTTCT           | TATTTTCTCTTCCATTCTC    | 55 | 149 |
|                | (CGTTTC) <sub>3</sub> | AAAAATCGTTTCTCATTTC            | CCTCATCCTTCTAACATTGTG  | 53 | 146 |
| <b>MIR835a</b> | (TTG) <sub>4</sub>    | TTATCTAAATCCGTCGTCGT           | AAAATTTTCGATCCTGGTG    | 55 | 152 |
|                | (TA) <sub>9</sub>     | TCTACAGAGGATGGAAAGTCA          | ACGAACAAGAACTGATGAAA   | 55 | 157 |
| <b>MIR837a</b> | (TTC) <sub>4</sub>    | No SSR flanking primer found   |                        |    |     |
|                | (TAAA) <sub>3</sub>   | TGGAAAAACATGAGGACTTTA          | AACATGAAAGAAACAGATCCA  | 55 | 210 |
| <b>MIR838a</b> | (TA) <sub>7</sub>     | ATGTTACTCGCTGTTCAACTC          | TCAAGGCTTCAAGAATCTACA  | 55 | 152 |
| <b>MIR839a</b> | (CTCA) <sub>3</sub>   | CAACTTCTCGTTGATGTTTA           | ATGCTACTCTTCTGCTCACA   | 55 | 165 |
| <b>MIR843a</b> | (AGA) <sub>4</sub>    | ATTAAACCAGCAGTGAAACAA          | TGAAGAAGCTAAAGGTTGGAT  | 55 | 153 |
| <b>MIR847a</b> | (TCT) <sub>7</sub>    | GACTCGAAGGTTGAAGAAAGT          | TATGGTGACGGATTTACAAAG  | 55 | 151 |
| <b>MIR849a</b> | (TTTA) <sub>3</sub>   | AGCTTTTCTTCTGGGTTATGT          | TGGTCTAGTAGTTGTCCAATCA | 55 | 165 |
| <b>MIR857a</b> | (TTTTA) <sub>3</sub>  | ATGAAGAAAACACCCAAAAAG          | TCTCCACAATAGTCACGCTAC  | 56 | 148 |
| <b>MIR863a</b> | (TATT) <sub>3</sub>   | GGGGAAAACCTTTTCTTATGT          | CTCTCAATCGCATTGGTATAA  | 54 | 213 |
|                | (ATC) <sub>4</sub>    | TTTTCTCTTTCGACTCCTCTT          | TCAAGGGTGTGAATCATTTAG  | 55 | 155 |
| <b>MIR866a</b> | (ATTA) <sub>3</sub>   | AACATCAAACCAACTTTCTGA          | TCAATTGTCTTTTCGAATCTC  | 55 | 166 |
|                | (AAG) <sub>4</sub>    | CAAACTGATTTAAAGTTTGTGG         | TGTCTATTGGGCTTACAAGAA  | 56 | 152 |
| <b>MIR867a</b> | (GAA) <sub>4</sub>    | AAAAGAAGAAGAAGACGATG           | TGATATTGGGCATTTGTCTAT  | 55 | 127 |
|                | (AT) <sub>10</sub>    | TAACAGTATTCGTGGGAAAAA          | CTTATCCAACAACCTACCACCA | 55 | 149 |
| <b>MIR869a</b> | (AT) <sub>6</sub>     | TGGTGGTAGTTGTTGGATAAG          | AGGAGTTTTCTCAAGAAGGTG  | 55 | 153 |
|                | (TCT) <sub>4</sub>    | AAACAATCGATCAACATCATC          | CAAAAATTTCAAATCCCATC   | 55 | 154 |
| <b>MIR870a</b> |                       |                                |                        |    |     |

(AGA)<sub>4</sub>

TTCGTAAAGAAACATTTGGTC

TGTTGCAAATGTTAGGAGTCT

55

152

---

532 **Table 2. Genes located adjacent to the miRNA-SSRs.**

533

| miRNA   | Accession Number | Chr no | 5' UTR genes | Gene Description                                                             | 3' UTR genes | Gene Description                                                               |
|---------|------------------|--------|--------------|------------------------------------------------------------------------------|--------------|--------------------------------------------------------------------------------|
| MIR838a | AT1G01046        | Chr 1  | AT1G01040    | Encodes a Dicer homolog.                                                     | AT1G01070    | Nodulin MtN21-like transporter family protein                                  |
| MIR165a | AT1G01183        | Chr 1  | AT1G01180    | S-adenosyl-L-methionine-dependent methyltransferases superfamily protein     | AT1G01210    | DNA-directed RNA polymerase                                                    |
| MIR847a | AT1G07051        | Chr 1  | AT1G07050    | CCT motif family protein                                                     | AT1G07060    | Unknown protein                                                                |
| MIR472a | AT1G12294        | Chr 1  | AT1G12290    | Disease resistance protein (CC-NBS-LRR class) family                         | AT1G12300    | Tetratricopeptide repeat (TPR)-like superfamily protein                        |
| MIR830a | AT1G14071        | Chr 1  | AT1G14060    | GCK domain-containing protein                                                | AT1G14090    | Pseudogene                                                                     |
| MIR159b | AT1G18075        | Chr 1  | AT1G18070    | Translation elongation factor EF1A/initiation factor IF2gamma family protein | AT1G18080    | Encodes the Arabidopsis thaliana homolog of the tobacco WD-40 repeat ArcA gene |
| MIR837a | AT1G18879        | Chr 1  | AT1G18871    | Unknown protein; LOCATED IN: endomembrane system                             | AT1G18880    | NITRATE TRANSPORTER                                                            |
| MIR394a | AT1G20375        | Chr 1  | AT1G20370    | Pseudouridine synthase family protein                                        | AT1G20380    | Prolyl oligopeptidase family protein                                           |
| MIR395c | AT1G26985        | Chr 1  | AT1G26976    | Unknown protein; FUNCTIONS IN: molecular_function unknown                    | AT1G26990    | Transposable element gene                                                      |
| MIR167d | AT1G31173        | Chr 1  | AT1G31166    | Transposable element gene                                                    | AT1G31175    | Unknown protein                                                                |
| MIR773a | AT1G35501        | Chr 1  | AT1G35500    | Unknown protein                                                              | AT1G35510    | O-fucosyltransferase family protein                                            |
| MIR161  | AT1G48267        | Chr 1  | AT1G48260    | Encodes a member of the SNF1-related kinase (SnRK) gene family               | AT1G48270    | Unknown protein                                                                |

|         |           |       |           |                                                                         |           |                                                                                              |
|---------|-----------|-------|-----------|-------------------------------------------------------------------------|-----------|----------------------------------------------------------------------------------------------|
| MIR157d | AT1G48742 | Chr 1 | AT1G48740 | 2-oxoglutarate (2OG) and Fe(II)-dependent oxygenase superfamily protein | AT1G48745 | Unknown protein                                                                              |
| MIR169d | AT1G53683 | Chr 1 | AT1G53660 | Nucleotide/sugar transporter family protein                             | AT1G53687 | MICRORNA169E                                                                                 |
| MIR169e | AT1G53687 | Chr 1 | AT1G53683 | Encodes a microRNA that targets several HAP2 family members             | AT1G53690 | Protein of unknown function that is homologous to At5g41010                                  |
| MIR426  | AT1G60025 | Chr 1 | AT1G60020 | Transposable element gene                                               | AT1G60050 | Nodulin MtN21-like transporter family protein                                                |
| MIR171c | AT1G62035 | Chr 1 | AT1G62030 | Cysteine/Histidine-rich C1 domain family protein                        | AT1G62045 | BEST Arabidopsis thaliana protein match is: ankyrin repeat family protein (TAIR:AT1G11740.1) |
| MIR399b | AT1G63005 | Chr 1 | AT1G62981 | Protein of unknown function (DUF1191)                                   | AT1G63010 | Major Facilitator Superfamily with SPX (SYG1/Pho81/XPR1) domain-containing protein           |
| MIR157a | AT1G66783 | Chr 1 | AT1G66780 | MATE efflux family protein                                              | AT1G66790 | Unknown protein                                                                              |
| MIR157b | AT1G66795 | Chr 1 | AT1G66790 | Unknown protein                                                         | AT1G66800 | Unknown protein                                                                              |
| MIR414  | AT1G67195 | Chr 1 | AT1G67190 | F-box/RNI-like superfamily protein                                      | AT1G67200 | Pseudogene                                                                                   |
| MIR839a | AT1G67481 | Chr 1 | AT1G67480 | Galactose oxidase/kelch repeat superfamily protein                      | AT1G67510 | Leucine-rich repeat protein kinase family protein                                            |
| MIR777a | AT1G70645 | Chr 1 | AT1G70640 | Octicosapeptide/Phox/Bem1p (PB1) domain-containing                      | AT1G70650 | Ran BP2/NZF zinc finger-like superfamily protein                                             |
| MIR159a | AT1G73687 | Chr 1 | AT1G73680 | Encodes an alpha dioxygenase                                            | AT1G73690 | CYCLIN-DEPENDENT KINASE D1                                                                   |
| MIR835a | AT1G76062 | Chr 1 | AT1G76050 | Pseudouridine synthase family protein                                   | AT1G76065 | LYR family of Fe/S cluster biogenesis protein                                                |
| MIR394b | AT1G76135 | Chr 1 | AT1G76120 | Pseudouridine synthase family protein                                   | AT1G76140 | Prolyl oligopeptidase family protein                                                         |
| MIR398a | AT2G03445 | Chr 2 | AT2G03430 | Ankyrin repeat family protein                                           | AT2G03460 | Galactose oxidase/kelch repeat superfamily protein                                           |
| MIR156g | AT2G19425 | Chr 2 | AT2G19420 | Unknown protein                                                         | AT2G19415 | Hydroxyproline-rich glycoprotein family protein                                              |

|         |           |       |           |                                                                |           |                                                              |
|---------|-----------|-------|-----------|----------------------------------------------------------------|-----------|--------------------------------------------------------------|
| MIR779a | AT2G22496 | Chr 2 | AT2G22482 | Unknown protein                                                | AT2G22510 | Polynucleotidyl transferase                                  |
| MIR405a | AT2G22668 | Chr 2 | N/A       | N/A                                                            | N/A       | N/A                                                          |
| MIR156a | AT2G25095 | Chr 2 | AT2G25090 | Encodes a member of the SNF1-related kinase (SnRK) gene family | AT2G25100 | Polynucleotidyl transferase                                  |
| MIR825a | AT2G26211 | Chr 2 | AT2G26210 | Ankyrin repeat family protein                                  | AT2G26215 | Transposable_element_gene                                    |
| MIR172a | AT2G28056 | Chr 2 | AT2G28053 | Transposable element gene                                      | AT2G28060 | 5'-AMP-activated protein kinase beta-2 subunit protein       |
| MIR417  | AT2G32273 | Chr 2 | AT2G32240 | Unknown protein                                                | AT2G32275 | Expressed protein                                            |
| MIR399d | AT2G34202 | Chr 2 | AT2G34200 | RING/FYVE/PHD zinc finger superfamily protein                  | AT2G34210 | Transcription elongation factor Spt5                         |
| MIR390a | AT2G38325 | Chr 2 | AT2G38304 | Unknown protein                                                | AT2G38330 | MATE efflux family protein                                   |
| MIR393a | AT2G39885 | Chr 2 | AT2G39870 | Unknown protein                                                | AT2G39900 | Encodes a member of the Arabidopsis LIM proteins             |
| MIR319c | AT2G40805 | Chr 2 | AT2G40802 | Unknown protein                                                | AT2G40815 | Calcium-dependent lipid-binding (CaLB domain) family protein |
| MIR159c | AT2G46255 | Chr 2 | AT2G46250 | Myosin heavy chain-related                                     | AT2G46260 | Encodes a member of the Arabidopsis LIM proteins             |
| MIR164a | AT2G47585 | Chr 2 | AT2G47570 | Ribosomal protein L18e/L15 superfamily protein                 | AT2G47610 | Ribosomal protein L7Ae/L30e/S12e/Gadd45 family protein       |
| MIR167c | AT3G04765 | Chr 3 | AT3G04760 | Pentatricopeptide repeat (PPR-like) superfamily protein        | AT3G04780 | Thioredoxin-like protein                                     |
| MIR169a | AT3G13405 | Chr 3 | AT3G13403 | Encodes a defensin-like (DEFL) family protein.                 | AT3G13410 | Unknown protein                                              |
| MIR157c | AT3G18217 | Chr 3 | AT3G18215 | Protein of unknown function, DUF599                            | AT3G18220 | LIPID PHOSPHATE PHOSPHATASE 4                                |
| MIR418  | AT3G18895 | Chr 3 | AT3G18890 | NAD(P)-binding Rossmann-fold superfamily protein               | AT3G18900 | FUNCTIONS IN: molecular_function unknown                     |

|         |           |       |           |                                                             |           |                                                                                        |
|---------|-----------|-------|-----------|-------------------------------------------------------------|-----------|----------------------------------------------------------------------------------------|
| MIR167a | AT3G22886 | Chr 3 | AT3G22870 | F-box and associated interaction domains-containing protein | AT3G22910 | ATPase E1-E2 type family protein / haloacid dehalogenase-like hydrolase family protein |
| MIR169m | AT3G26818 | Chr 3 | AT3G26816 | Encodes a microRNA that targets several HAP2 family members | AT3G26819 | MICRORNA169N                                                                           |
| MIR169n | AT3G26819 | Chr 3 | AT3G26818 | Encodes a microRNA that targets several HAP2 family members | AT3G26820 | Esterase/lipase/thioesterase family protein                                            |
| MIR849a | AT3G44444 | Chr 3 | AT3G44440 | unknown protein                                             | AT3G44450 | unknown protein                                                                        |
| MIR843a | AT3G48057 | Chr 3 | AT3G48050 | 'SHUTTLE' IN CHINESE, SUO                                   | AT3G48058 | pseudogene of Rac-like GTP-binding protein                                             |
| MIR171a | AT3G51375 | Chr 3 | AT3G51370 | Protein phosphatase 2C family protein                       | AT3G51390 | DHHC-type zinc finger family protein                                                   |
| MIR172d | AT3G55512 | Chr 3 | AT3G55490 | GINS complex protein                                        | AT3G55520 | FKBP-like peptidyl-prolyl cis-trans isomerase family protein                           |
| MIR166b | AT3G61897 | Chr 3 | AT3G61870 | unknown protein                                             | AT3G61898 | unknown protein                                                                        |
| MIR167b | AT3G63375 | Chr 3 | AT3G63360 | Encodes a defensin-like (DEFL) family protein.              | AT3G63380 | ATPase E1-E2 type family protein / haloacid dehalogenase-like hydrolase family protein |
| MIR165b | AT4G00885 | Chr 4 | AT4G00880 | SAUR-like auxin-responsive protein family                   | AT4G00890 | Encodes a putative glycosyl hydrolase family 10 protein (xylanase).                    |
| MIR826a | AT4G03039 | Chr 4 | AT4G03030 | Galactose oxidase/kelch repeat superfamily protein          | AT4G03038 | Unknown gene                                                                           |
| MIR405d | AT4G05508 | Chr 4 | N/A       | N/A                                                         | N/A       | N/A                                                                                    |
| MIR401  | AT4G08116 | Chr 4 | N/A       | N/A                                                         | N/A       | N/A                                                                                    |
| MIR832a | AT4G10345 | Chr 4 | AT4G10330 | Glycine-rich protein                                        | AT4G10360 | TRAM                                                                                   |
| MIR863a | AT4G13494 | Chr 4 | AT4G13495 | Unknown gene                                                | AT4G13500 | Unknown protein                                                                        |
| MIR857a | AT4G13554 | Chr 4 | AT4G13550 | Triglyceride lipases                                        | AT4G13555 | MICRORNA397B                                                                           |



|         |           |       |           |                                                                                |           |                                                                                      |
|---------|-----------|-------|-----------|--------------------------------------------------------------------------------|-----------|--------------------------------------------------------------------------------------|
| MIR397b | AT4G13555 | Chr 4 | AT4G13554 | Encodes a microRNA that targets a Laccase family member                        | AT4G13575 | unknown protein                                                                      |
| MIR160b | AT4G17788 | Chr 4 | AT4G17780 | F-box and associated interaction domains-containing protein                    | AT4G17790 | SNARE associated Golgi protein family                                                |
| MIR168a | AT4G19395 | Chr 4 | AT4G19390 | Uncharacterised protein family (UPF0114)                                       | AT4G19400 | Profilin family protein                                                              |
| MIR867a | AT4G21362 | Chr 4 | AT4G21360 | Transposable element gene                                                      | AT4G21363 | transposable element gene                                                            |
| MIR319a | AT4G23713 | Chr 4 | AT4G23690 | Encodes a homodimeric all-beta dirigent protein in the superfamily of calycins | AT4G23720 | Protein of unknown function (DUF1191)                                                |
| MIR156b | AT4G30972 | Chr 4 | AT4G30970 | Unknown protein                                                                | AT4G30975 | Unknown gene                                                                         |
| MIR419  | AT4G32445 | Chr 4 | AT4G32440 | Plant Tudor-like RNA-binding protein                                           | AT4G32450 | Pentatricopeptide repeat (PPR) superfamily protein                                   |
| MIR164b | AT5G01747 | Chr 5 | AT5G01740 | Nuclear transport factor 2 (NTF2) family protein                               | AT5G01750 | Protein of unknown function (DUF567)                                                 |
| MIR822a | AT5G03552 | Chr 5 | AT5G03550 | TRAF-like family protein                                                       | AT5G03555 | NUCLEOBASE CATION SYMPORTER 1                                                        |
| MIR172b | AT5G04275 | Chr 5 | AT5G04270 | DHHC-type zinc finger family protein                                           | AT5G04280 | ATRZ-1C                                                                              |
| MIR166c | AT5G08712 | Chr 5 | AT5G08710 | Regulator of Chr condensation (RCC1) family protein                            | AT5G08720 | CONTAINS InterPro DOMAIN/s: Streptomyces cyclase/dehydrase (InterPro:IPR005031)      |
| MIR166d | AT5G08717 | Chr 5 | AT5G08710 | Regulator of Chr condensation (RCC1) family protein                            | AT5G08720 | CONTAINS InterPro DOMAIN/s: Streptomyces cyclase/dehydrase (InterPro:IPR005031)      |
| MIR156d | AT5G10945 | Chr 5 | AT5G10946 | Unknown protein                                                                | AT5G10950 | Tudor/PWWP/MBT superfamily protein                                                   |
| MIR156e | AT5G11977 | Chr 5 | AT5G11970 | Protein of unknown function (DUF3511)                                          | AT5G11980 | Conserved oligomeric Golgi complex component-related / COG complex component-related |
| MIR398c | AT5G14565 | Chr 5 | AT5G14560 | Unknown protein                                                                | AT5G14580 | polyribonucleotide nucleotidyltransferase                                            |

|         |           |       |           |                                                                       |           |                                                         |
|---------|-----------|-------|-----------|-----------------------------------------------------------------------|-----------|---------------------------------------------------------|
| MIR162b | AT5G23065 | Chr 5 | AT5G23035 | Encodes a defensin-like (DEFL) family protein.                        | AT5G23070 | Thymidine kinase                                        |
| MIR169b | AT5G24825 | Chr 5 | AT5G24820 | Eukaryotic aspartyl protease family protein                           | AT5G24830 | Tetratricopeptide repeat (TPR)-like superfamily protein |
| MIR156f | AT5G26147 | Chr 5 | AT5G26140 | LONELY GUY 9 (LOG9)                                                   | AT5G26146 | Potential natural antisense gene                        |
| MIR164c | AT5G27807 | Chr 5 | AT5G27800 | Class II aminoacyl-tRNA and biotin synthetases superfamily protein    | AT5G27810 | MADS-box transcription factor family protein            |
| MIR169c | AT5G39635 | Chr 5 | AT5G39630 | Vesicle transport v-SNARE family protein                              | AT5G39640 | Putative endonuclease or glycosyl hydrolase             |
| MIR869a | AT5G39693 | Chr 5 | AT5G39670 | Calcium-binding EF-hand family protein                                | AT5G39730 | AIG2-like (avirulence induced gene) family protein      |
| MIR866a | AT5G40384 | Chr 5 | AT5G40382 | Cytochrome c oxidase subunit Vc family protein                        | AT5G40400 | Pentatricopeptide repeat (PPR) superfamily protein      |
| MIR319b | AT5G41663 | Chr 5 | AT5G41660 | Unknown protein                                                       | AT5G41670 | 6-phosphogluconate dehydrogenase family protein         |
| MIR166e | AT5G41905 | Chr 5 | AT5G41900 | alpha/beta-Hydrolases superfamily protein                             | AT5G41908 | Unknown protein                                         |
| MIR166f | AT5G43603 | Chr 5 | AT5G43590 | Acyl transferase/acyl hydrolase/lysophospholipase superfamily protein | AT5G43620 | Pre-mRNA cleavage complex II                            |
| MIR405b | AT5G50717 | Chr 5 | N/A       | N/A                                                                   | N/A       | N/A                                                     |
| MIR870a | AT5G52797 | Chr 5 | AT5G52790 | FUNCTIONS IN: molecular_function unknown                              | AT5G52780 | Protein of unknown function (DUF3464)                   |
| MIR156h | AT5G55835 | Chr 5 | AT5G55830 | Concanavalin A-like lectin protein kinase family protein              | AT5G55840 | Pentatricopeptide repeat (PPR) superfamily protein      |
| MIR390b | AT5G58465 | Chr 5 | AT5G58450 | Tetratricopeptide repeat (TPR)-like superfamily protein               | AT5G58480 | O-Glycosyl hydrolases family 17 protein                 |

|         |           |       |           |                                                   |           |                                 |
|---------|-----------|-------|-----------|---------------------------------------------------|-----------|---------------------------------|
| MIR166g | AT5G63715 | Chr 5 | AT5G63710 | Leucine-rich repeat protein kinase family protein | AT5G63720 | KOKOPELLI, KPL                  |
| MIR170  | AT5G66045 | Chr 5 | AT5G66010 | RNA-binding (RRM/RBD/RNP motifs) family protein   | AT5G66050 | Wound-responsive family protein |
